# Supplementary material
Source: Research Square preprint supplement (doi:10.21203/rs.3.rs-9222046/v1)
Supplement: Supplementary file 1 [file dfcf7046441ebefddcec20ac.docx]

**Supplementary Methodological Documentation**

for

*Reconceptualizing the Automation–Augmentation Tension in AI-Enabled Talent Selection:*

*A Stage-Embedded Theory*

# 1. Overview and Purpose of This Document

This supplementary document provides comprehensive methodological documentation to support the editorial and peer review process. It details the data sources, analytical procedures, coding schemes, and verification strategies employed in the study. The document is organized to address each component requested by the editorial office, adapted to the qualitative, theory-building nature of the research.

As described in the manuscript (Section 3: Methodology), this study adopts a comparative, multi-case study design (Eisenhardt & Graebner, 2007; Yin, 2018) that relies entirely on publicly available secondary data sources. No primary data (e.g., interviews, surveys, or proprietary datasets) were collected. Consequently, the concepts of “raw datasets,” “variable definitions,” and “statistical code” are reinterpreted below in terms appropriate for qualitative case-based research, following established conventions in the field (Gioia, Corley & Hamilton, 2013; Pratt, Kaplan & Whittington, 2020).

# 2. Data Sources and Materials (Raw Datasets)

In qualitative case-based research, the equivalent of “raw datasets” consists of the complete corpus of source materials from which analytical inferences are drawn. This study draws on six categories of publicly available secondary data, each serving a distinct analytical function. All sources are cited in the manuscript and listed in the Reference section.

## 2.1 Data Source Catalog

Table S1 provides a comprehensive catalog of data source categories, their descriptions, access points, analytical functions, and selection criteria.

***Table S1. Comprehensive Data Source Catalog***

| **Source Category** | **Description** | **Access** | **Analytical Function** | **Selection Criteria** |
| --- | --- | --- | --- | --- |
| Peer-reviewed academic publications | Published empirical and theoretical studies on AI in recruitment, algorithmic decision-making, human–AI collaboration, and personnel selection | Academic databases (Web of Science, Scopus, Google Scholar) | Theoretical grounding; empirical evidence of AI deployment patterns; validation of constructs (e.g., task analyzability, algorithmic aversion) | Studies selected based on relevance to AI-enabled recruitment across identified stages; inclusion required explicit discussion of AI configuration, outcomes, or governance mechanisms |
| Practitioner and industry research reports | Reports from HR technology research firms, consulting organizations, and professional associations documenting AI adoption trends and outcomes | Publicly accessible reports from organizations such as SHRM, Deloitte, McKinsey, and HR technology vendors | Quantified outcome data (e.g., time-to-hire reduction, applicant volume metrics); practitioner perspectives on AI deployment challenges | Prioritized reports with verifiable data points and transparent methodology; cross-referenced with academic sources for triangulation |
| Corporate disclosures and press releases | Official organizational communications regarding AI recruitment tool deployment, modification, or discontinuation | Corporate websites, investor relations pages, official blog posts (e.g., IBM Think, HackerRank Blog) | Direct evidence of organizational decisions regarding AI configuration; stated rationales for adoption or withdrawal | Included only disclosures from organizations meeting case selection criteria; verified against independent third-party reporting |
| Regulatory filings and legal documents | Government regulations, audit requirements, and legal proceedings pertaining to AI in employment decisions | Public regulatory databases; legislative records (e.g., GDPR Article 22, NYC Local Law 144); court filings | Institutional accountability requirements; legal constraints on automation; regulatory triggers for re-augmentation | Focused on regulations directly governing AI use in recruitment/selection contexts |
| Technology vendor documentation | Technical specifications, product descriptions, and implementation guides from AI recruitment technology providers | Vendor websites, product documentation, API references (e.g., HireVue, Pymetrics, Eightfold AI, Textio) | Technical capabilities and limitations of AI systems; design choices reflecting automation vs. augmentation orientations | Assessed for alignment between vendor claims and independently reported outcomes |
| Credible journalistic investigations | In-depth reporting by established news organizations on AI recruitment practices, controversies, and organizational responses | Major news outlets (e.g., Reuters, Forbes, The Wall Street Journal, The New York Times) | Critical incidents (e.g., Amazon bias case); organizational responses to legitimacy challenges; public discourse on AI fairness | Included only reporting from established, editorially vetted outlets; cross-verified facts across multiple sources |

## 2.2 Data Accessibility Statement

All data sources used in this study are publicly available. Peer-reviewed articles are accessible through standard academic databases (Web of Science, Scopus, Google Scholar). Corporate disclosures, regulatory documents, and journalistic reports are accessible through the URLs and citations provided in the Reference section of the manuscript. No restricted, proprietary, or confidential data were used at any stage of the research. Reviewers and editors may access and verify all source materials through the citations provided.

# 3. Variable Definitions, Coding Scheme, and Transformations

In qualitative research, “variable definitions” correspond to the analytical constructs and coding categories through which empirical materials are systematically interpreted. This study employed an iterative coding process informed by the Gioia methodology (Gioia, Corley & Hamilton, 2013), moving from open coding of source materials to theory-informed categorization and, ultimately, to aggregate theoretical dimensions.

## 3.1 Coding Scheme

Table S2 presents the complete coding scheme used in the analysis, including all first-order codes, second-order categories, the coding stage at which each was applied, and operational definitions.

***Table S2. Complete Coding Scheme with Operational Definitions***

| **Code / Category** | **Definition** | **Coding Stage** | **Operational Specification** |
| --- | --- | --- | --- |
| AI functionality references | Descriptions of what the AI system does in each recruitment stage | Open coding | Identified specific AI tasks: resume parsing, game-based assessment, video analysis, automated scheduling, predictive scoring |
| Decision process descriptors | How decisions are structured—who/what makes, recommends, or overrides decisions | Open coding | Classified decision authority as: fully automated, AI-recommended with human override, human-led with AI support, fully human |
| Organizational intent signals | Stated or inferred organizational goals for AI deployment at each stage | Open coding | Categorized as: efficiency/cost reduction, quality improvement, bias reduction, compliance, scalability |
| Reported consequences | Documented outcomes, both intended and unintended, of AI deployment | Open coding | Mapped outcomes: quantified efficiency gains, bias incidents, legitimacy challenges, system discontinuation, reconfiguration events |
| AI configuration type | Classification of the human–AI arrangement at each recruitment stage | Theory-informed categorization | Automation (AI decides autonomously), Augmentation (AI supports human decision), Hybrid (shared authority with defined boundaries) |
| Task characteristics | Properties of the recruitment task at each stage relevant to AI suitability | Theory-informed categorization (Task Complementarity Theory) | Analyzability (high/medium/low), Ambiguity (high/medium/low), Error tolerance (high/medium/low), Evaluative complexity (objective/subjective) |
| Legitimacy dynamics | Evidence of institutional pressures affecting AI configuration choices | Theory-informed categorization (Paradox Theory / Institutional Theory) | Accountability demands, regulatory compliance triggers, public scrutiny events, stakeholder trust indicators |
| Configuration transitions | Observable shifts from one AI configuration to another within or across stages | Cross-case pattern analysis | Automation → Augmentation (re-augmentation), Augmentation → Automation (automation escalation), Stable configuration maintenance, Oscillation patterns |
| Stage-embedded mechanisms | Recurring causal processes explaining why configurations differ across stages | Aggregate theoretical dimensions | Efficiency-driven stabilization (early stages), Paradoxical tension intensification (intermediate stages), Accountability-constrained institutionalization (late stages), Re-augmentation loops (cross-stage) |

## 3.2 Analytical Dimensions for Stage-Based Mapping

For each recruitment stage in each case, data were analyzed along four structured analytical dimensions. Table S3 details these dimensions, including the guiding question, classification criteria, and application rules.

***Table S3. Analytical Dimensions for Stage-Based Mapping of AI Configurations***

| **Dimension** | **Guiding Question** | **Classification Criteria** | **Application Rules** |
| --- | --- | --- | --- |
| 1. Primary AI Role | What role does AI play at this recruitment stage? | Automation: AI operates independently without human intervention in the decision loop Augmentation: AI provides recommendations, scores, or insights that humans evaluate and may override Hybrid: Shared decision authority with predefined rules for human–AI interaction | Classified based on documented decision authority allocation; verified through outcome evidence (e.g., whether human review occurred before decisions were finalized) |
| 2. Task Characteristics | What are the properties of the recruitment task at this stage? | Analyzability: Degree to which the task can be decomposed into rule-based, codifiable procedures Ambiguity: Extent of interpretive judgment required Error Tolerance: Organizational and social consequences of incorrect decisions Evaluative Complexity: Objective criteria vs. subjective holistic assessment | Derived from established personnel selection literature (Schmidt & Hunter, 1998; Campion et al., 1997; Gatewood et al., 2020); applied consistently across all cases using the standardized recruitment framework (Table 1) |
| 3. Organizational Responses and Outcomes | What happened as a result of AI deployment at this stage? | Efficiency gains (quantified where available) Decision quality changes Bias detection events Legitimacy challenges System modification or discontinuation | Documented from multiple source types; outcomes triangulated across corporate disclosures, journalistic investigations, and academic analyses |
| 4. Temporal Dynamics | Did the organization transition between configurations, and why? | Transition type: Automation → Augmentation, Augmentation → Automation, Stable, Oscillating Transition trigger: Bias detection, regulatory pressure, efficiency demand, legitimacy threat Transition outcome: Reconfiguration, system withdrawal, governance reform | Traced through chronological reconstruction of documented events; classified using paradox theory concepts (Smith & Lewis, 2011; Raisch & Krakowski, 2021) |

## 3.3 Transformations Applied

The analytical process involved three sequential transformations of the source material, consistent with established qualitative research practice:

**Transformation 1 – Source-to-Case Mapping:** Each data source was mapped to the relevant case organization(s) and recruitment stage(s) using the standardized recruitment framework (Table 1 in the manuscript). This transformation converted heterogeneous source materials into a structured case-by-stage matrix.

**Transformation 2 – Open Coding to Theoretical Categories:** Initial open codes (first-order concepts) were iteratively consolidated into theory-informed categories (second-order themes) through constant comparison across cases and stages. This process followed the Gioia methodology, ensuring that emergent categories were grounded in empirical evidence while informed by paradox theory and task complementarity theory.

**Transformation 3 – Cross-Case Pattern Identification:** Second-order categories were compared across cases to identify recurring stage-embedded mechanisms. These mechanisms were then abstracted into aggregate theoretical dimensions that form the basis of the propositions advanced in the manuscript. Discrepancies across cases were treated as analytically informative, often revealing boundary conditions of the emerging theory.

# 4. Analytical Procedures (Formulae, Statistical Code, and Scripts)

As a qualitative, theory-building study, this research does not employ statistical formulae, quantitative code, or computational scripts. The analytical procedures consist entirely of systematic qualitative methods. This section documents these procedures in sufficient detail to enable replication and scrutiny.

## 4.1 Analytical Process

**Step 1 – Case Compilation:** For each selected case organization, all relevant source materials were compiled and organized chronologically. Materials were cataloged by source type, publication date, recruitment stage addressed, and key claims or data points reported.

**Step 2 – Stage-Based Coding:** Each case was systematically coded along the four analytical dimensions described in Table S3. Coding was performed independently for each recruitment stage within each case, producing a structured case-by-stage-by-dimension matrix.

**Step 3 – Within-Case Analysis:** For each case, patterns across recruitment stages were analyzed to identify how AI configurations varied by stage and whether transitions between configurations occurred over time. This step produced within-case narratives of AI configuration dynamics.

**Step 4 – Cross-Case Comparison:** Within-case patterns were compared across all cases to identify recurring mechanisms. Following Eisenhardt’s (1989) approach, similarities across cases strengthened emerging constructs, while differences sharpened boundary conditions and contingencies.

**Step 5 – Theoretical Abstraction:** Recurring cross-case patterns were abstracted into three stage-embedded mechanisms (efficiency-driven stabilization, paradoxical tension intensification, accountability-constrained institutionalization) and one cross-stage mechanism (re-augmentation loops). These mechanisms were then formalized as four theoretical propositions.

**Step 6 – Theoretical Validation:** Emerging propositions were iteratively tested against the case evidence, refining definitions and boundary conditions. Propositions were retained only when supported by evidence from multiple cases and consistent with the broader theoretical framework integrating paradox theory and task complementarity theory.

## 4.2 Analytical Logic (in Lieu of Statistical Formulae)

While this study does not employ statistical formulae, the analytical logic follows established principles of qualitative inference:

**Pattern matching (Yin, 2018):** Observed AI configurations at each recruitment stage were compared against theoretically predicted patterns derived from task complementarity theory and paradox theory. Matches strengthened the theoretical framework; mismatches prompted theoretical refinement.

**Theoretical replication (Eisenhardt & Graebner, 2007):** Multiple cases were selected to enable literal replication (similar patterns across similar conditions) and theoretical replication (contrasting patterns under different conditions). The recurrence of stage-embedded mechanisms across organizationally diverse cases supports the generalizability of the theoretical framework.

**Triangulation (Yin, 2018):** Each analytical claim was supported by evidence from at least two independent data source categories. Claims supported by a single source were flagged and either corroborated through additional searching or explicitly qualified in the manuscript.

# 5. Case Selection Criteria and Rationale

Table S4 details the three criteria used for theoretical sampling of case organizations, including the operationalization and justification for each criterion.

***Table S4. Case Selection Criteria***

| **Criterion** | **Description** | **Operationalization** | **Justification** |
| --- | --- | --- | --- |
| Criterion 1: Sustained AI use | Organization demonstrates documented and sustained use of AI technologies in recruitment, beyond isolated pilots | AI deployment must be part of organizational routines, not one-time experiments | Ensures observed configurations reflect institutionalized practices |
| Criterion 2: Sufficient public documentation | Sufficient publicly available and credible documentation exists to reconstruct AI deployment, adjustment, and outcomes across recruitment stages | Multiple independent sources must be available for each case | Enables triangulation and systematic analysis without reliance on single narratives |
| Criterion 3: Configuration variation | Cases exhibit variation in AI configurations and observable transitions over time | Evidence of automation, augmentation, and/or hybrid configurations must be present, along with transitions between them | Critical for theorizing the automation–augmentation paradox as a dynamic process |

The final case set includes Unilever, Amazon, Hilton, IBM, and specialized HR technology providers (HireVue, Pymetrics, Textio, HackerRank, Eightfold AI, and others). These cases collectively span all stages of the recruitment process and exhibit sufficient variation in AI configurations to support theory building.

# 6. Strategies for Ensuring Rigor and Analytical Validity

The following strategies were employed to ensure the quality and trustworthiness of the research, consistent with established standards for qualitative rigor (Gioia, Corley & Hamilton, 2013; Pratt, Kaplan & Whittington, 2020; Yin, 2018):

**Construct validity:** Strengthened through data triangulation across six source categories and by anchoring the analysis in a standardized recruitment framework derived from established personnel selection literature. Analytical constructs (automation, augmentation, hybrid) were operationally defined with explicit classification criteria (Table S3).

**Internal validity:** Addressed by explicitly linking observed patterns to theoretical mechanisms through pattern matching and cross-case comparison, rather than relying on post hoc narrative interpretation. Rival explanations (e.g., that configuration differences reflect technological maturity rather than institutional dynamics) were systematically considered and addressed.

**External validity (analytic generalization):** Achieved through theoretical replication across multiple organizationally diverse cases. The recurrence of stage-embedded mechanisms across cases with different organizational sizes, industries, and technological contexts supports the transferability of the theoretical framework.

**Reliability:** Supported through transparent documentation of case selection criteria (Table S4), analytical dimensions (Table S3), coding logic (Table S2), and the sequential analytical process (Section 4.1). This documentation enables reviewers to trace the path from source materials to theoretical propositions.

# 7. Additional Documentation for Verification

## 7.1 Source Reference Verification Guide

All source materials cited in the manuscript are publicly accessible. The Reference section of the manuscript provides complete bibliographic information, including DOIs for academic publications and URLs for online sources. Reviewers may verify any specific claim by consulting the cited source(s). Where multiple sources corroborate a single claim, the manuscript cites the primary source with additional supporting references as appropriate.

## 7.2 Recruitment Stage Framework Derivation

The standardized recruitment framework used for case mapping (Table 1 in the manuscript) was derived from established personnel selection literature, including Schmidt and Hunter (1998), Campion, Palmer, and Campion (1997), Gatewood, Feild, and Barrick (2020), and Sackett et al. (2022). The framework decomposes recruitment into sequential, interdependent stages—from applicant pool formation through post-hire validation—each characterized by distinct task properties and institutional exposure levels. This framework is not original to this study but is adapted from the cumulative personnel selection literature to serve as an analytical scaffold for cross-case comparison.

## 7.3 Limitations of the Methodological Approach

As acknowledged in the manuscript (Section 6: Conclusion), this study has methodological limitations inherent in secondary-data-based qualitative research. First, reliance on publicly available documentation means that internal organizational deliberations, informal decision processes, and unpublished outcomes are not captured. Second, the depth of available documentation varies across cases and stages, potentially creating uneven analytical coverage. Third, as a theory-building study, the propositions advanced require empirical testing through primary data collection methods such as longitudinal field studies, organizational surveys, or experimental designs. These limitations are explicitly discussed in the manuscript and are offered as directions for future research.

# 8. Data Availability Statement

This study is based on a qualitative, comparative multi-case study design that relies entirely on publicly available secondary data sources. The data comprise peer-reviewed academic publications, practitioner research reports, corporate disclosures, regulatory filings, technology vendor documentation, and credible journalistic investigations. All sources used in the analysis are cited within the manuscript and listed in the Reference section. No primary data (e.g., interviews, surveys, or proprietary datasets) were collected or used. As all materials are publicly accessible through the cited references, no additional datasets or supplementary files are required for verification. Researchers seeking to replicate or scrutinize the analysis may access the original sources through the citations provided herein.
